# Supplementary material for: Phytochemical Analyses, Antioxidant and Anticancer Activities of Ethanolic Leaf Extracts of Moringa oleifera Lam. Varieties
Source: MDPI journal article supplement (doi:10.3390/plants10112348), 2021-10-30
Supplement: s1 [file s1]

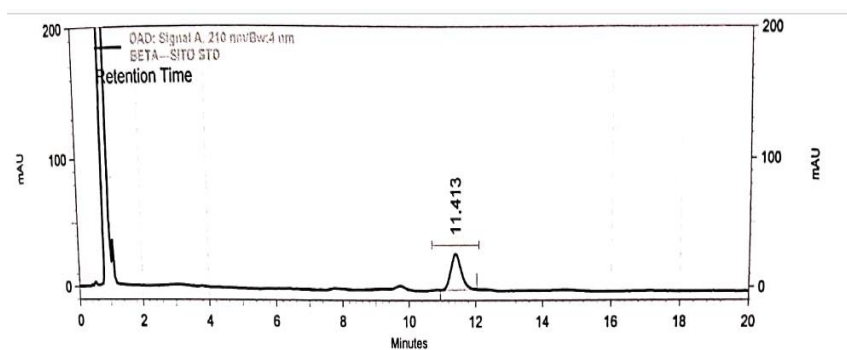

**A**

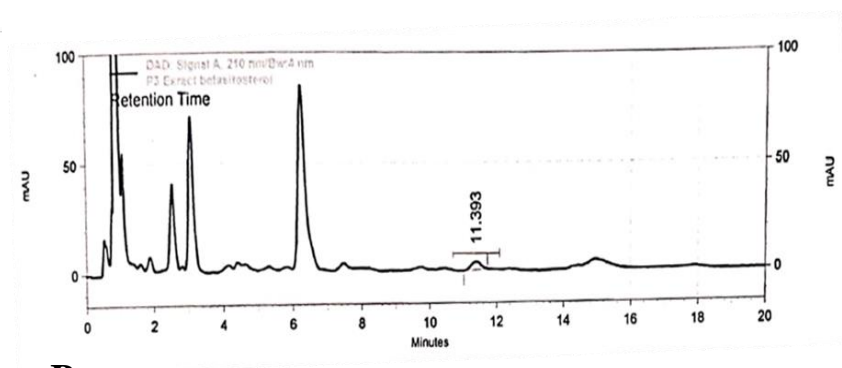

**B**

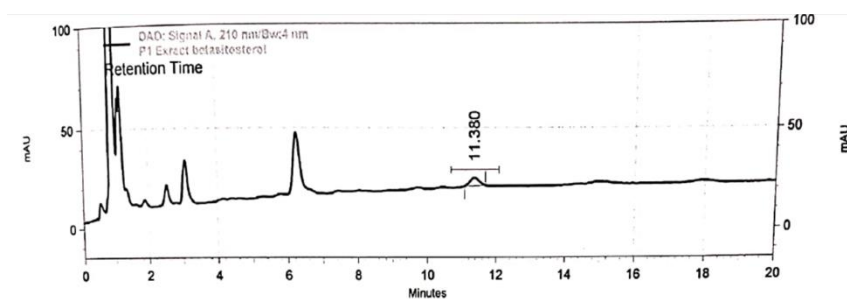

**C**

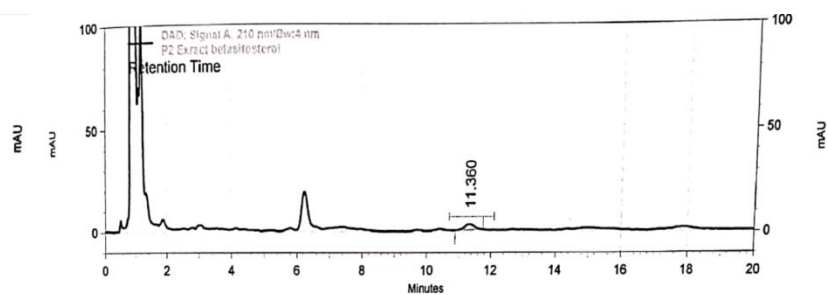

**D**

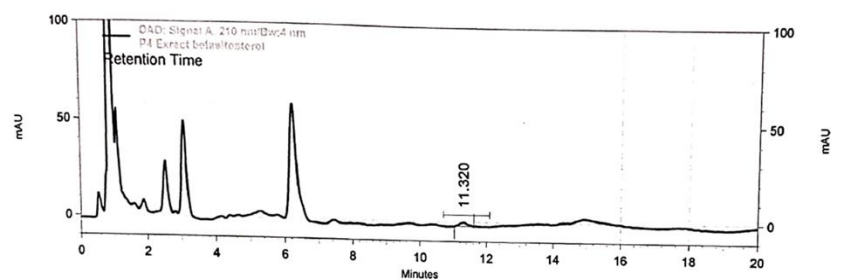

**E**

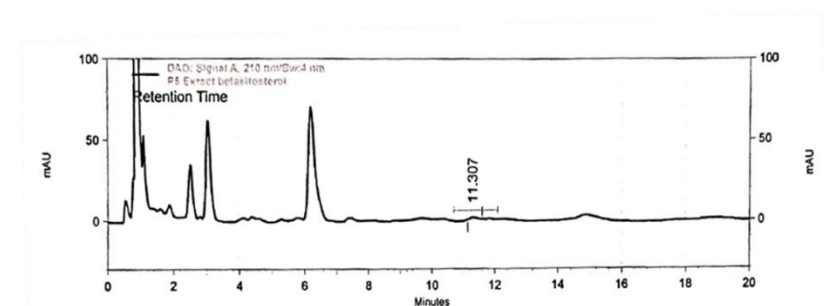

**F**

**Figure S1a:** HPLC chromatogram for estimation of  $\beta$ -sitosterol content in *M.oleifera* varieties leaf extracts.[A] standard compound [B] Jaffna [C] PKM-1 [D] PKM-2 [F] ODC and [F] Conventional..

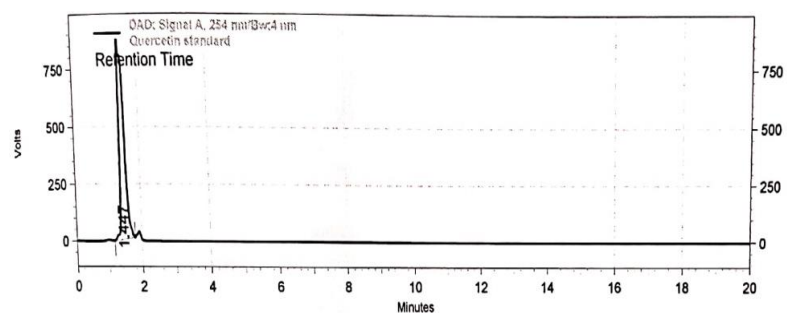

**A**

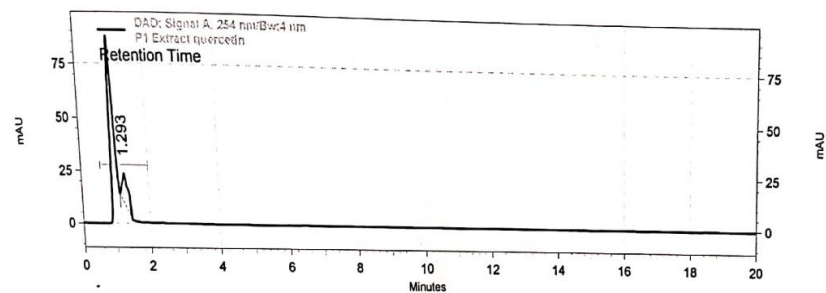

**B**

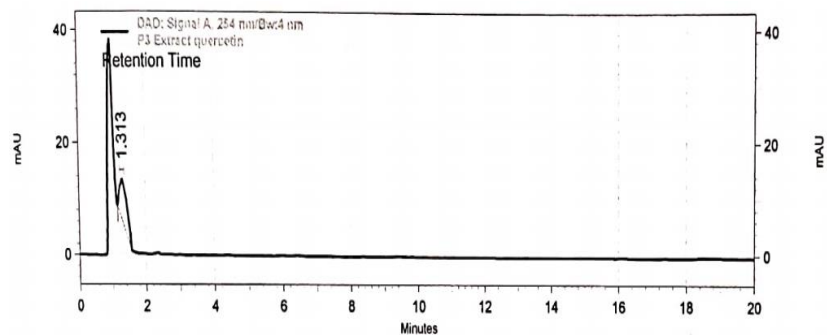

**C**

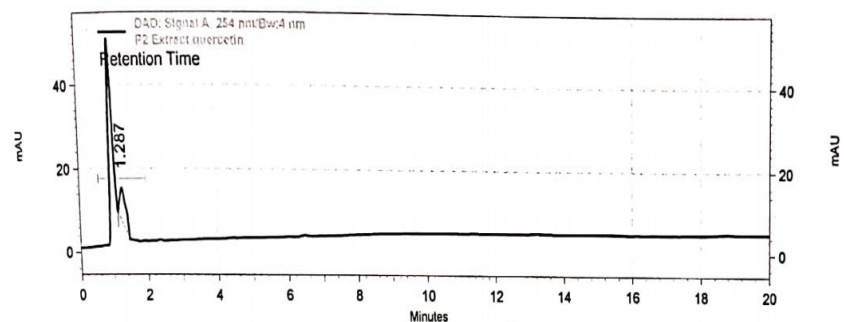

**D**

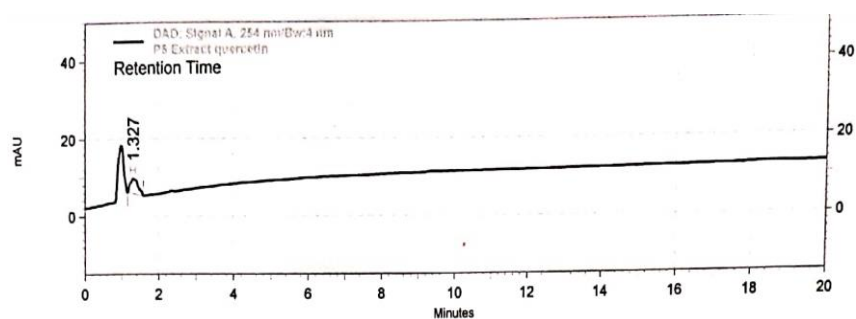

**E**

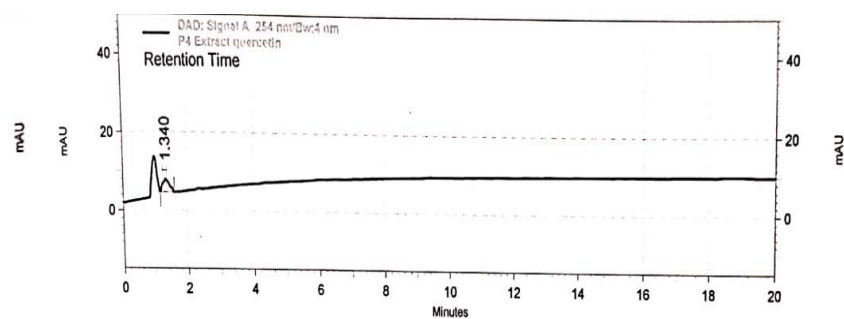

**F**

**Figure S1b:** HPLC chromatogram for estimation of Quercetin content in *M.oleifera* varieties leaf extracts. [A] Standard compound [B] Jaffna, [C] PKM-1 [D] PKM-2 [E] ODC and [F] Conventional.

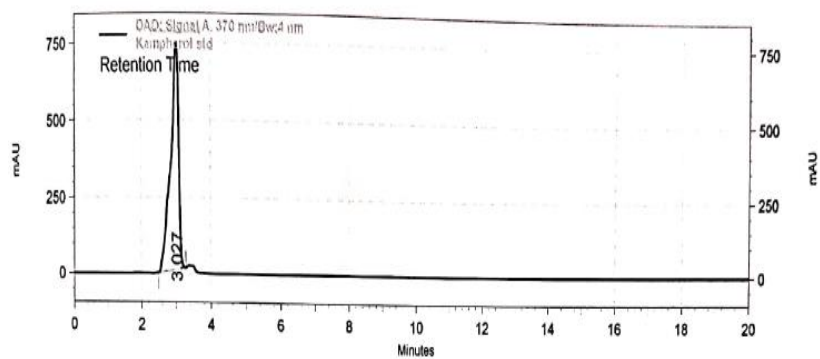

**A**

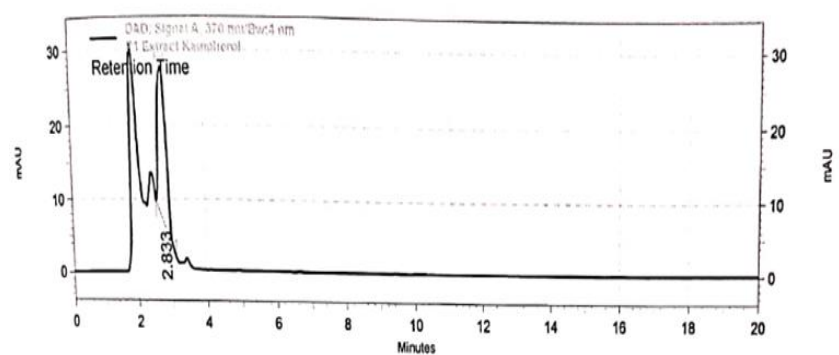

**B**

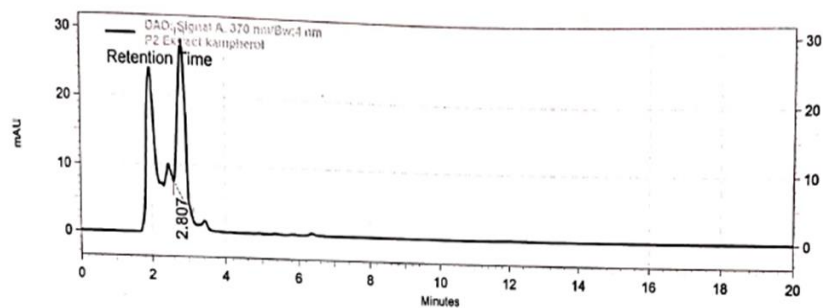

**C**

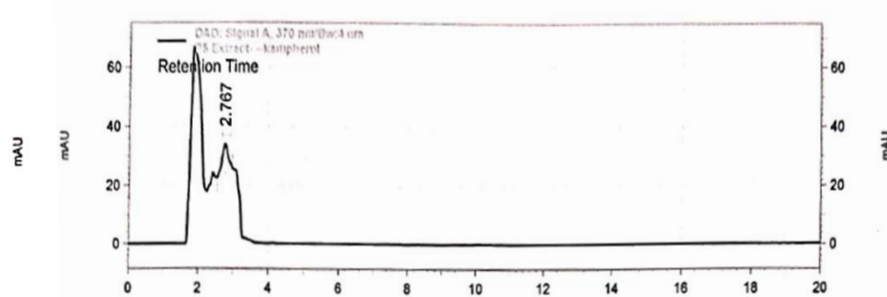

**D**

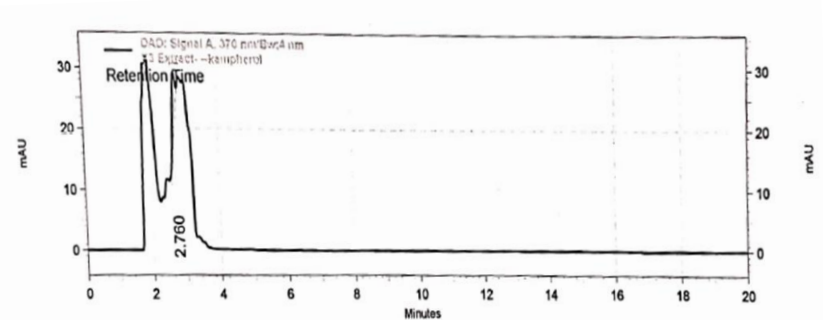

**E**

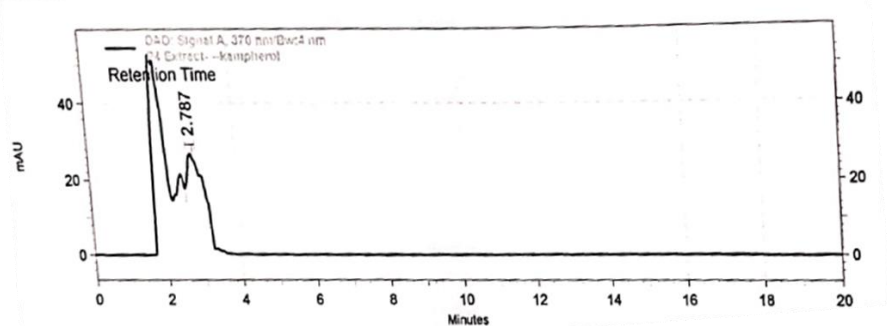

**F**

**Figure S1c :** HPLC chromatogram for estimation of Kaempferol content in *M.oleifera* varieties leaf extracts.[A] Standard compound [B] Jaffna [C] PKM-1, [D] PKM-2 [E] ODC and [F] Conventional.

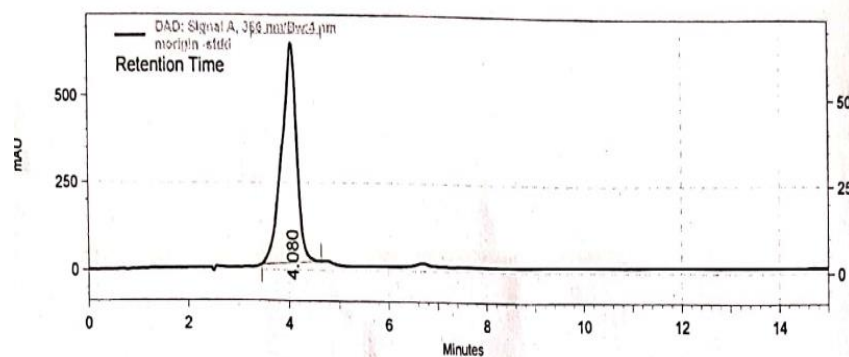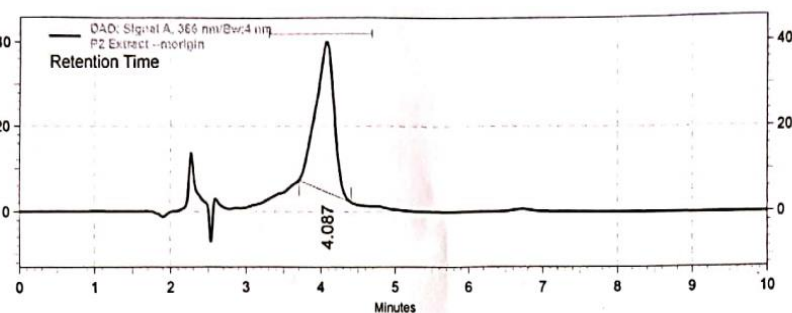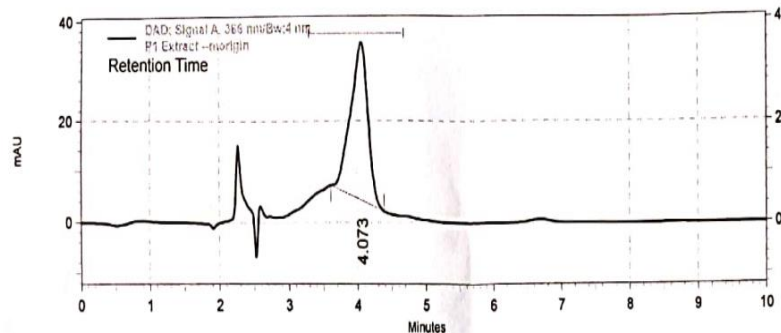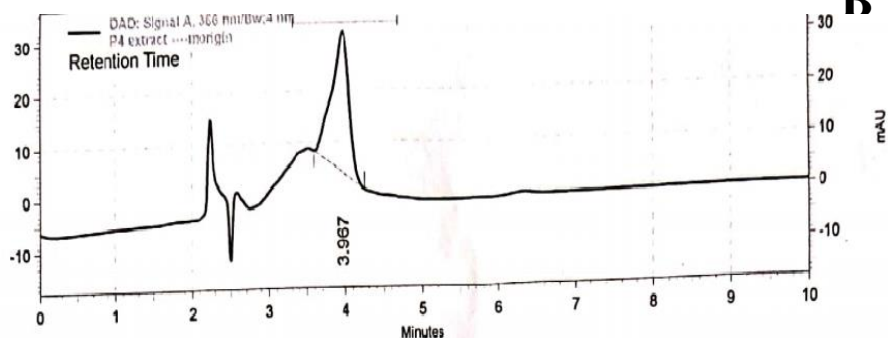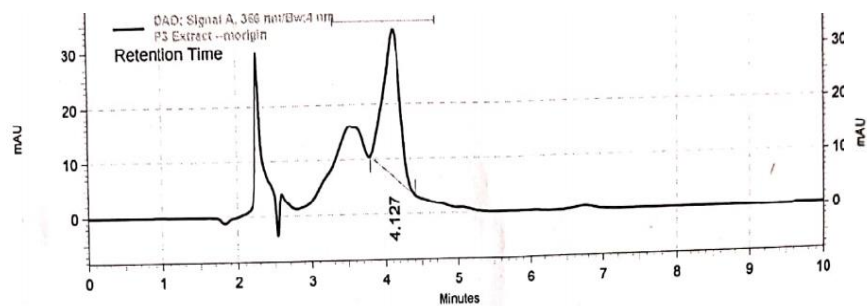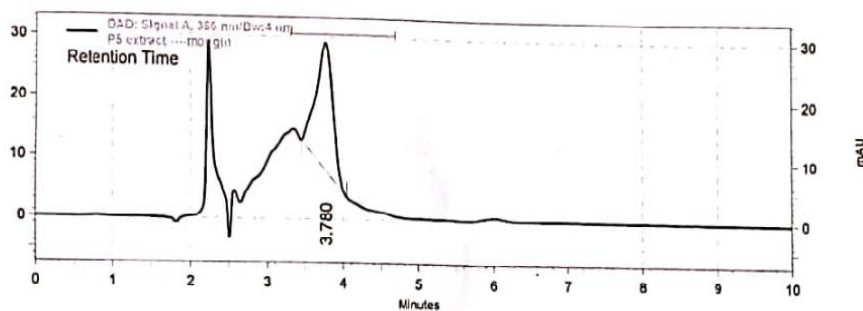

**Figure S1d:** HPLC chromatogram for estimation of Moringin content in *M.oleifera* varieties leaf extracts. [A] Standard compound [B] Jaffna [C] PKM-1 [D] PKM-2 [E] ODC and [F] Conventional.

**Supplementary Table S1:** Anti-bacterial activity (bacterial zone of inhibition values) of *M. oleifera* varieties.

| Aqueous leaf extract    |                         |                         |                          |                         | Aqueous seed extract    |                         |                         |                         |
|-------------------------|-------------------------|-------------------------|--------------------------|-------------------------|-------------------------|-------------------------|-------------------------|-------------------------|
| Varieties               | <i>E. coli</i>          | <i>B. subtilis</i>      | <i>P. aeruginosa</i>     | <i>S. aureus</i>        | <i>E. coli</i>          | <i>B. subtilis</i>      | <i>P. aeruginosa</i>    | <i>S. aureus</i>        |
| Jaffna                  | 13.63±0.65 <sup>a</sup> | 14.66±0.41 <sup>a</sup> | 16.83±0.20 <sup>a</sup>  | 11.83±0.15 <sup>a</sup> | 12.53±0.45 <sup>a</sup> | 14.86±0.15 <sup>a</sup> | 16.66±0.35 <sup>a</sup> | 10.63±0.30 <sup>a</sup> |
| PKM-1                   | 10.13±0.61 <sup>b</sup> | 12.66±0.41 <sup>b</sup> | 15.83±0.20 <sup>b</sup>  | 10.70±0.26 <sup>b</sup> | 10.66±0.35 <sup>b</sup> | 12.70±0.30 <sup>b</sup> | 15.73±0.30 <sup>b</sup> | 9.66±0.30 <sup>b</sup>  |
| PKM-2                   | 9.76±0.25 <sup>c</sup>  | 11.20±0.20 <sup>c</sup> | 13.80±0.20 <sup>c</sup>  | 13.36±3.78 <sup>c</sup> | 8.63±0.40 <sup>c</sup>  | 10.56±0.40 <sup>c</sup> | 13.63±0.47 <sup>c</sup> | 7.70±0.30 <sup>c</sup>  |
| ODC                     | 8.60±0.45 <sup>d</sup>  | 13.83±0.41 <sup>d</sup> | 13.63±0.35 <sup>d</sup>  | 8.86±0.85 <sup>d</sup>  | 8.63±0.47 <sup>d</sup>  | 9.33±0.20 <sup>d</sup>  | 11.80±0.35 <sup>d</sup> | 10.60±0.36 <sup>d</sup> |
| Conventional            | 6.76±0.32 <sup>c</sup>  | 10.03±0.90 <sup>e</sup> | 9.96±0.90 <sup>e</sup>   | 5.73±0.30 <sup>e</sup>  | 6.93±0.50 <sup>e</sup>  | 8.56±0.45 <sup>e</sup>  | 9.70±0.26 <sup>e</sup>  | 3.53±0.26 <sup>e</sup>  |
| Ethanollic leaf extract |                         |                         |                          |                         | Ethanollic seed extract |                         |                         |                         |
| Jaffna                  | 23.6±0.36 <sup>a</sup>  | 26.00±0.80 <sup>a</sup> | 27.80±0.43 <sup>a*</sup> | 25.00±0.40 <sup>a</sup> | 22.56±0.45 <sup>a</sup> | 23.80±0.20 <sup>a</sup> | 25.86±0.15 <sup>a</sup> | 20.66±0.30 <sup>a</sup> |
| PKM-1                   | 22.4±0.50 <sup>b</sup>  | 24.90±0.45 <sup>b</sup> | 23.90±0.26 <sup>b</sup>  | 23.00±0.10 <sup>b</sup> | 20.06±0.81 <sup>b</sup> | 20.20±0.20 <sup>b</sup> | 24.63±0.35 <sup>b</sup> | 19.83±0.15 <sup>b</sup> |
| PKM-2                   | 19.83±0.85 <sup>c</sup> | 20.33±0.61 <sup>c</sup> | 23.23±0.20 <sup>c</sup>  | 19.83±0.15 <sup>c</sup> | 17.70±0.36 <sup>c</sup> | 20.13±0.51 <sup>c</sup> | 21.73±0.25 <sup>c</sup> | 18.26±0.30 <sup>c</sup> |
| ODC                     | 18.0±0.40 <sup>d</sup>  | 20.83±0.20 <sup>d</sup> | 20.26±0.30 <sup>d</sup>  | 16.73±0.25 <sup>d</sup> | 12.70±0.20 <sup>d</sup> | 13.66±0.41 <sup>d</sup> | 18.60±0.36 <sup>d</sup> | 9.70±0.30 <sup>d</sup>  |
| Conventional            | 13.66±0.41 <sup>c</sup> | 18.46±0.61 <sup>e</sup> | 18.43±0.40 <sup>e</sup>  | 14.63±0.40 <sup>e</sup> | 9.50±0.40 <sup>e</sup>  | 14.70±0.43 <sup>e</sup> | 16.70±0.30 <sup>e</sup> | 8.70±0.25 <sup>e</sup>  |

\*LSD: least significantly different at  $p \leq 0.05$  according to the posthoc test. Each value is presented as mean of triplicate treatments.

**Supplementary Table S2:** Plant growth promoting activity of *M. oleifera* varieties leaf extract on *S. rebaudiana*.

| Foliar spray | Shoot length (cm)         | Root length (cm)          | No. of leaves          | Plant dry weight (gm)    | Chlorophyll a content (mg/g FW) | Chlorophyll b content (mg/g FW) | Carotenoid content (mg/g FW) | Total soluble sugars content (mg/g FW) | Total protein content (mg/g FW) | Total Phenolic content (µg/g FW) | Total flavonoid content (µg/g FW) |
|--------------|---------------------------|---------------------------|------------------------|--------------------------|---------------------------------|---------------------------------|------------------------------|----------------------------------------|---------------------------------|----------------------------------|-----------------------------------|
| Water        | 12.46±0.40 <sup>a*</sup>  | 6.05 ± 0.30 <sup>a</sup>  | 48±3.05 <sup>a</sup>   | 1.32 ± 0.01 <sup>a</sup> | 0.75 ± 0.03 <sup>a</sup>        | 0.78 ± 0.02 <sup>a</sup>        | 0.25 ± 0.02 <sup>a</sup>     | 9.31± 0.78 <sup>a</sup>                | 4.40 ± 0.62 <sup>a</sup>        | 230.41 ± 0.25 <sup>a</sup>       | 112.21 ± 0.66 <sup>a</sup>        |
| Jaffna       | 35.43 ± 0.20 <sup>b</sup> | 30.70 ± 0.50 <sup>b</sup> | 138±3.50 <sup>b</sup>  | 4.90 ± 0.43 <sup>b</sup> | 0.85 ± 0.03 <sup>b</sup>        | 0.87 ± 0.01 <sup>b</sup>        | 0.45 ± 0.01 <sup>b</sup>     | 25.69 ± 0.63 <sup>b</sup>              | 8.43 ± 0.84 <sup>b</sup>        | 420.46 ± 0.50 <sup>b</sup>       | 194.43 ± 0.25 <sup>b</sup>        |
| PKM-1        | 33.26 ± 0.30 <sup>c</sup> | 22.40 ± 0.30 <sup>c</sup> | 122±3.60 <sup>c</sup>  | 4.46 ± 0.34 <sup>c</sup> | 0.83 ± 0.01 <sup>c</sup>        | 0.86 ± 0.01 <sup>c</sup>        | 0.41 ± 0.01 <sup>c</sup>     | 22.80± 0.82 <sup>c</sup>               | 7.75 ± 0.49 <sup>c</sup>        | 387.20 ± 0.20 <sup>c</sup>       | 185.50± 0.36 <sup>c</sup>         |
| PKM-2        | 28.40 ± 0.30 <sup>d</sup> | 25.50 ± 0.20 <sup>d</sup> | 103±4.30 <sup>d</sup>  | 4.01 ± 0.20 <sup>d</sup> | 0.81 ± 0.01 <sup>d</sup>        | 0.83 ± 0.01 <sup>d</sup>        | 0.35 ± 0.01 <sup>d</sup>     | 17.84 ± 0.84 <sup>d</sup>              | 7.28 ± 0.78 <sup>d</sup>        | 356.36 ± 0.32 <sup>d</sup>       | 162.13 ± 0.90 <sup>d</sup>        |
| ODC          | 27.10 ± 0.26 <sup>e</sup> | 15.70 ± 0.30 <sup>e</sup> | 88 ± 3.50 <sup>e</sup> | 3.13 ± 0.48 <sup>e</sup> | 0.79 ± 0.01 <sup>e</sup>        | 0.82 ± 0.01 <sup>e</sup>        | 0.30 ± 0.02 <sup>e</sup>     | 14.83 ± 0.79 <sup>e</sup>              | 6.69 ± 0.53 <sup>e</sup>        | 308.36 ± 0.15 <sup>e</sup>       | 135.30 ± 0.26 <sup>e</sup>        |
| Conventional | 20.63 ± 0.20 <sup>f</sup> | 12.50 ± 0.90 <sup>f</sup> | 64 ± 4.04 <sup>f</sup> | 2.82 ± 0.04 <sup>f</sup> | 0.78 ± 0.01 <sup>f</sup>        | 0.80 ± 0.01 <sup>f</sup>        | 0.27 ± 0.02 <sup>f</sup>     | 12.05 ± 0.81 <sup>f</sup>              | 5.66 ± 0.55 <sup>f</sup>        | 280.40 ± 0.40 <sup>f</sup>       | 120.86 ± 0.90 <sup>f</sup>        |

\*LSD: least significantly different at  $p \leq 0.05$  according to the posthoc test. Each value is presented as mean of triplicate treatment

**Supplementary Table S3:** Phytochemical constituents reported in different parts of *Moringa oleifera*.

| Plant part | Bioactive compound                                         | Biological activity                                                                                                                                                        | Chemical structure                                                                    | Reference(s) |
|------------|------------------------------------------------------------|----------------------------------------------------------------------------------------------------------------------------------------------------------------------------|---------------------------------------------------------------------------------------|--------------|
| Leaves     | Niazirin                                                   | Hypotensive activity                                                                                                                                                       | 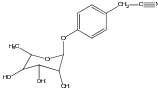   | [1,2–5]      |
|            | Niazirinin                                                 |                                                                                                                                                                            |    |              |
|            | 4-(4'-O-acetyl-α-Lrhamnopyranosyloxy)benzyl isothiocyanate | Antibacterial, Antitumor, Anticancer, Antiulcer, Antispasmodic, Antihyperthyroidic, Estrogenic, Hypoglycaemic, Hypocholesterolemic, Purgative and Abortifacient properties |    |              |
|            | Niaziminin A and B                                         | Antitumor and Hypotensive activity                                                                                                                                         |    |              |
|            | Niazimicin                                                 | Antispasmodic, Anticancer, Antibacterial, Antitumour                                                                                                                       |   |              |
| Bark       | 4-(α-Lrhamnopyranosyloxy)benzyl glucosinolate              | Hypotensive, Anticancer, Antibacterial, Antifungal activity                                                                                                                |  | [1]          |
| Stem       | β-sitosterol                                               | Anticancer and hypotensive activity                                                                                                                                        |  | [1,4,6,7]    |
|            | 4-(α-Lrhamnopyranosyloxy)benzyl glucosinolate              | Hypotensive, Anticancer, Antibacterial and Antifungal activity                                                                                                             |  |              |
| Roots      | Moringine                                                  | Cardiac stimulant, hypolipidimic bronchodilator activity                                                                                                                   |  |              |

|            |                                                  |                                                                              |                                                                                       |       |
|------------|--------------------------------------------------|------------------------------------------------------------------------------|---------------------------------------------------------------------------------------|-------|
|            | Pterygosperrin                                   | Antimicrobial, antibacterial and Anti-fungal properties                      | 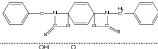   |       |
| Flower     | Quercetin                                        | Antioxidant and Hepatoprotective activity                                    |    | [1,7] |
|            | Isoquercetin                                     | Antioxidant activity                                                         |    |       |
|            | Kaempferol                                       | Antioxidant activity                                                         |    |       |
|            | Kaempferitrin                                    | Antioxidant, Antimicrobial and Anti-inflammatory activity                    |    |       |
|            | Ascorbic acid                                    | Antioxidant activity                                                         |    |       |
|            | O-ethyl-4-(α-L-rhamnosyloxy)benzyl carbamate     | Antitumor activity                                                           |    |       |
| Pods/Seeds | 4(α-L-rhamnosyloxy)-benzyl isothiocyanate        | Antitumor, Antimicrobial, Hypotensive, Anticancer and Antibacterial activity |    | [1,4] |
|            | Niazimicin                                       | Antispasmodic, Anticancer and Antitumour                                     |   |       |
|            | 3-O-(6'-O-oleoyl-β-Dglucopyranosyl)-β-sitosterol | Antitumor and Anticancer property                                            |  |       |
|            | β-sitosterol-3-O-β-Dglucopyranoside              | Anticancer property                                                          |  |       |



|  |                                                         |                                                                                                                 |                                                                                     |  |
|--|---------------------------------------------------------|-----------------------------------------------------------------------------------------------------------------|-------------------------------------------------------------------------------------|--|
|  | Niazirin                                                | Hypotensive activity                                                                                            | 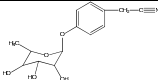 |  |
|  | $\beta$ -sitosterol                                     | Anticancer property                                                                                             |  |  |
|  | Glycerol-1-(9octadecanoate)                             | Anticancer property                                                                                             |  |  |
|  | 4-( $\alpha$ -Lrhamnopyranosyloxy) benzyl glucosinolate | Hypotensive, Anticancer, Antibacterial and Antifungal activity                                                  |  |  |
|  | $\beta$ -carotene.                                      | Antioxidant activity                                                                                            |  |  |
|  | Vitamin A                                               | Prevents blindness, maternal mortality, enhances lactation (breast milk); Enhances immunity to fight infections |  |  |

1. Anwar, F.; Latif, S.; Ashraf, M.; Gilani, A.H. *Moringa oleifera*: A food plant with multiple medicinal uses. *Phytother. Res.* **2007**, *21*, 17–25.
2. Gilani, A.H.; Aftab, K.; Suria, A.; Siddiqui, S.; Salem, R.; Siddiqui, B.S.; Faizi, S. Pharmacological studies on hypotensive and spasmolytic activities of pure compounds from *Moringa oleifera*. *Phytother. Res.* **1994**, *8*, 87–91.
3. Bennett, R.N.; Mellon, F.A.; Foidl, N.; Pratt, J.H.; Dupont, M.S.; Perkins, L.; Kroon, P.A. Profiling glucosinolates and phenolics in vegetative and reproductive tissues of the multi-purpose trees *Moringa oleifera* L.(horseradish tree) and *Moringa stenopetala* L. *J. Agric. Food Chem.* **2003**, *51*, 3546–3553.
4. Kumar, P.S.; Mishra, D.; Ghosh, G.; Panda, C.S. Medicinal uses and pharmacological properties of *Moringa oleifera*. *Int. J. Phytomed.* **2010**, *2*, 210–216.
5. Farooq, F.; Rai, M.; Tiwari, A.; Khan, A.A.; Farooq, S. Medicinal properties of *Moringa oleifera*: An overview of promising healer. *J. Med. Plants Res.* **2012**, *6*, 4368–4374.
6. Sutherland, J.; Folkard, G.; Grant, W. Natural coagulants for appropriate water treatment: A novel approach. *Waterlines* **1990**, *8*, 30–32.
7. Ruckmani, K.; Kavimani, S.; An, R.; Jaykar, B. Effect of *Moringa oleifera* Lam on paracetamol-induced hepatotoxicity. *Indian J. Pharm. Sci.* **1998**, *60*, 33.
